# Supplementary material
Source: Springer Nature journal article supplement (https://www.springermedizin.de/resource/supplementary/12969_2010_423_MOESM3_ESM.pdf/9593016)

| Year Starting July 1 | Training Level 1 | Training Level 2 | Training Level 3 | Total |
|----------------------|------------------|------------------|------------------|-------|
| 2007                 | 26               | 31               | 24               | 81    |
| 2008                 | 38               | 24               | 26               | 88    |
| 2009                 | 33               | 31               | 23               | 87    |

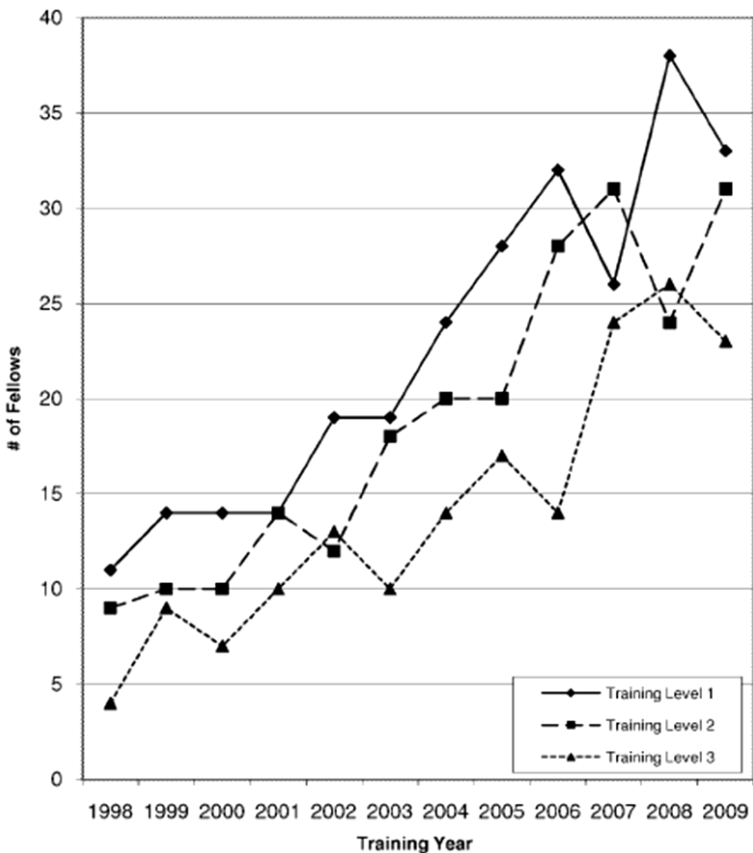

Supplement: MOESM3 [file 9593016]
